# Supplementary material
Source: Springer Nature journal article supplement (https://www.springermedizin.de/resource/supplementary/13049_2009_149_MOESM1_ESM.pdf/9666108)
Supplement: MOESM1 [file 9666108]

Identification

Records identified through  
database searching  
(n = 1,655)

Additional records identified  
through other sources  
(n = 28)

Records after duplicates removed  
(n = 1,645)

Screening

Records screened  
(n = 1,645)

Records excluded  
(n = 1,615)

Eligibility

Full-text articles assessed  
for eligibility  
(n = 30)

Full-text articles excluded,  
with reasons  
(n = 17)

- two due to endpoints
- one narrative review
- six in wrong environment
- one consensus paper
- six for specified groups
- one not a scoring system

Included

Studies included in  
qualitative synthesis  
(n = 13)

Studies included in  
quantitative synthesis  
(meta-analysis)  
(n = 10)
